# Supplementary material for: Alcohol Use among Adolescent Youth: The Role of Friendship Networks and Family Factors in Multiple School Studies
Source: PubMed Central journal article supplement (PMC4355410; doi:10.1371/journal.pone.0119965), 2015-03-10
Supplement: pone.0119965.s005.pdf [file pone.0119965.s005.pdf]

**S1 Table. Stochastic Actor-Based model of friendship tie choice and adolescent drinking behavior, for 12 small schools ( $n = 1,284$ ).**

| Effect name                                             | Model 1  |      | Model 2  |      | Model 3  |      | Model 4  |      |
|---------------------------------------------------------|----------|------|----------|------|----------|------|----------|------|
|                                                         | beta     | s.e. | beta     | s.e. | beta     | s.e. | beta     | s.e. |
| <b>Network decision: Friendship tie choice</b>          |          |      |          |      |          |      |          |      |
| Constant friendship rate (period 1)                     | 15.72*** | 0.54 | 15.78*** | 0.54 | 15.57*** | 0.69 | 15.56*** | 0.76 |
| Out-degree (density)                                    | -2.09*** | 0.32 | -2.03*** | 0.24 | -2.01*** | 0.16 | -1.89*** | 0.24 |
| Reciprocity                                             | 1.79***  | 0.15 | 1.78***  | 0.08 | 1.78***  | 0.10 | 1.79***  | 0.09 |
| Transitive triplets                                     | 0.23***  | 0.03 | 0.23***  | 0.03 | 0.23***  | 0.03 | 0.22***  | 0.03 |
| 3-cycles                                                | -0.14**  | 0.05 | -0.15*   | 0.07 | -0.14*   | 0.05 | -0.14*   | 0.06 |
| In-degree popularity                                    | 0.07***  | 0.01 | 0.07***  | 0.01 | 0.07***  | 0.01 | 0.07***  | 0.01 |
| In-in degree <sup>(1/2)</sup> assortativity             | -0.07**  | 0.02 | -0.07*   | 0.03 | -0.07*   | 0.03 | -0.07*   | 0.03 |
| Gender similarity                                       | 0.20***  | 0.03 | 0.20***  | 0.03 | 0.20***  | 0.04 | 0.20***  | 0.04 |
| Parental education similarity                           | 0.03     | 0.03 | 0.04     | 0.04 | 0.04     | 0.03 | 0.04     | 0.02 |
| Grade similarity                                        | 0.45***  | 0.03 | 0.44***  | 0.02 | 0.45***  | 0.03 | 0.45***  | 0.02 |
| Parental support ego                                    | 0.35***  | 0.09 | 0.34*    | 0.14 | 0.35***  | 0.11 | 0.37***  | 0.10 |
| Parental monitoring ego                                 | 0.07     | 0.20 | 0.02     | 0.19 | -0.42    | 0.29 | 0.06     | 0.20 |
| Parental home drinking environment ego                  | -0.03    | 0.05 | -0.04    | 0.08 | -0.04    | 0.03 | -0.23*** | 0.06 |
| Drinking alter                                          | 0.28*    | 0.12 | 0.24***  | 0.05 | 0.29***  | 0.07 | 0.09†    | 0.05 |
| Drinking ego                                            | -0.07    | 0.11 | -0.05    | 0.05 | -0.06    | 0.06 | -0.05    | 0.07 |
| Drinking similarity                                     | 0.33**   | 0.11 | 0.26***  | 0.06 | 0.35***  | 0.06 | 0.29***  | 0.09 |
| Parental support ego x Drinking alter                   |          |      | -0.17*   | 0.07 |          |      |          |      |
| Parental monitoring ego x Drinking alter                |          |      |          |      | 0.30     | 0.31 |          |      |
| Parental home drinking environment ego x Drinking alter |          |      |          |      |          |      | 0.18*    | 0.06 |
| <b>Behavior decision: Alcohol Use</b>                   |          |      |          |      |          |      |          |      |
| Rate drinking behavior (period 1)                       | 24.03*** | 2.46 | 7.37***  | 1.03 | 21.10*** | 1.29 | 23.22*** | 2.29 |
| Drinking behavior linear shape                          | -1.78*** | 0.13 | -4.60**  | 1.44 | -1.75*** | 0.23 | -1.82*** | 0.30 |
| Drinking behavior quadratic shape                       | 0.30***  | 0.02 | 0.22***  | 0.06 | 0.29***  | 0.02 | 0.30***  | 0.02 |
| Drinking behavior in-degree                             | 0.01     | 0.01 | 0.07     | 0.05 | 0.02†    | 0.01 | 0.01†    | 0.01 |
| Drinking behavior peer influence                        | 0.22*    | 0.10 | -0.99    | 1.45 | 0.32*    | 0.15 | 0.10     | 0.17 |
| Effect from gender (female=1)                           | -0.06    | 0.05 | -0.40†   | 0.24 | -0.06    | 0.05 | -0.06    | 0.04 |
| Effect from grade                                       | 0.03*    | 0.01 | 0.22*    | 0.09 | 0.03†    | 0.02 | 0.03†    | 0.02 |

|                                                                 |         |      |         |      |         |      |        |      |
|-----------------------------------------------------------------|---------|------|---------|------|---------|------|--------|------|
| Effect from depressive symptoms                                 | 0.00    | 0.05 | 0.12    | 0.36 | 0.00    | 0.05 | 0.00   | 0.05 |
| Effect from parental home drinking environment                  | 0.10*** | 0.03 | 0.53*** | 0.20 | 0.11*** | 0.03 | 0.09*  | 0.04 |
| Effect from parental support                                    | -0.01   | 0.07 | 6.21*   | 2.94 | -0.01   | 0.09 | -0.01  | 0.11 |
| Effect from parental monitoring                                 | -0.39*  | 0.18 | -1.84*  | 0.84 | -0.10   | 0.26 | -0.39* | 0.19 |
| Effect from parental support x peer influence                   |         |      | 23.64** | 8.43 |         |      |        |      |
| Effect from parental monitoring x peer influence                |         |      |         |      | 3.08†   | 1.84 |        |      |
| Effect from parental home drinking environment x peer influence |         |      |         |      |         |      | -0.11  | 0.17 |

† Two-sided p<0.1; \* Two-sided p<0.05; \*\* Two-sided p<0.01; \*\*\* Two-sided p<0.001
