# Supplementary material for: Alcohol Use among Adolescent Youth: The Role of Friendship Networks and Family Factors in Multiple School Studies
Source: PubMed Central journal article supplement (PMC4355410; doi:10.1371/journal.pone.0119965), 2015-03-10
Supplement: pone.0119965.s006.pdf [file pone.0119965.s006.pdf]

**S2 Table. Ancillary models including interaction terms between school contexts and key drinking effects for 12 small schools ( $n = 1,284$ ).**

| Effect name                                 | Model 1  |      | Model 2  |      | Model 3  |      |
|---------------------------------------------|----------|------|----------|------|----------|------|
|                                             | beta     | s.e. | beta     | s.e. | beta     | s.e. |
| Friendship Tie Choice                       |          |      |          |      |          |      |
| Constant friendship rate (period 1)         | 15.96*** | 0.61 | 15.51*** | 1.03 | 15.50*** | 0.67 |
| Out-degree (density)                        | -1.76*** | 0.15 | -2.26*** | 0.15 | -1.89*** | 0.17 |
| Reciprocity                                 | 1.73***  | 0.07 | 1.77***  | 0.18 | 1.79***  | 0.09 |
| Transitive triplets                         | 0.23***  | 0.03 | 0.23***  | 0.04 | 0.23***  | 0.03 |
| 3-cycles                                    | -0.14*   | 0.07 | -0.14*   | 0.06 | -0.14**  | 0.05 |
| In-degree - popularity                      | 0.06***  | 0.01 | 0.06***  | 0.02 | 0.07***  | 0.01 |
| In-in degree <sup>(1/2)</sup> assortativity | -0.05*   | 0.02 | -0.06†   | 0.03 | -0.07**  | 0.02 |
| Gender similarity                           | 0.21***  | 0.04 | 0.21**   | 0.07 | 0.20***  | 0.04 |
| Parental education similarity               | 0.04     | 0.02 | 0.04     | 0.03 | 0.04†    | 0.02 |
| Grade similarity                            | 0.45***  | 0.03 | 0.44***  | 0.03 | 0.45***  | 0.03 |
| Parental support ego                        | 0.32***  | 0.09 | 0.32***  | 0.10 | 0.34***  | 0.09 |
| Parental monitoring ego                     | -0.01    | 0.16 | 0.03     | 0.18 | 0.01     | 0.23 |
| Parental home drinking environment ego      | -0.02    | 0.03 | -0.02    | 0.04 | -0.04    | 0.03 |
| Drinking alter                              | 0.12     | 0.09 | 0.55***  | 0.12 | 0.33**   | 0.12 |
| Drinking ego                                | -0.01    | 0.10 | -0.02    | 0.09 | -0.05    | 0.08 |
| Drinking similarity                         | 0.28***  | 0.08 | 0.35**   | 0.12 | 0.34*    | 0.15 |
| School type (public=1, private=0) ego       | -0.30    | 0.22 |          |      |          |      |
| Urban school (urban=1, else=0) ego          |          |      | 0.46     | 0.42 |          |      |
| Rural school (rural=1, else=0) ego          |          |      | 0.34     | 0.22 |          |      |
| Race composition (multiple=1, single=0) ego |          |      |          |      | -0.16    | 0.10 |
| School type ego x drinking alter            | 0.17     | 0.23 |          |      |          |      |
| Urban school x drinking alter               |          |      | -0.39    | 0.37 |          |      |
| Rural school x drinking alter               |          |      | -0.29    | 0.20 |          |      |
| Race composition x drinking alter           |          |      |          |      | -0.05    | 0.09 |
| Drinking Behavior                           |          |      |          |      |          |      |
| Rate drinking behavior (period 1)           | 23.23*** | 1.93 | 20.47*** | 1.99 | 23.57*** | 2.01 |
| Drinking behavior linear shape              | -1.75*** | 0.22 | -2.67**  | 0.97 | -1.94*** | 0.27 |

|                                                     |         |      |         |      |         |      |
|-----------------------------------------------------|---------|------|---------|------|---------|------|
| Drinking behavior quadratic shape                   | 0.30*** | 0.02 | 0.27*** | 0.07 | 0.30*** | 0.02 |
| Drinking behavior in-degree                         | 0.01    | 0.01 | 0.01    | 0.02 | 0.01    | 0.01 |
| Drinking behavior new similarity                    | 0.36*   | 0.15 | -2.07   | 2.17 | -0.11   | 0.53 |
| Effect from gender (female=1)                       | -0.06   | 0.04 | -0.08   | 0.06 | -0.07†  | 0.04 |
| Effect from grade                                   | 0.03†   | 0.02 | 0.03    | 0.03 | 0.03†   | 0.02 |
| Effect from depressive symptoms                     | 0.00    | 0.05 | 0.01    | 0.06 | 0.00    | 0.04 |
| Effect from parental home drinking environment      | 0.09*   | 0.05 | 0.11*   | 0.05 | 0.10*** | 0.02 |
| Effect from parental support                        | -0.01   | 0.08 | -0.02   | 0.11 | -0.01   | 0.10 |
| Effect from parental monitoring                     | -0.40†  | 0.21 | -0.49   | 0.33 | -0.38†  | 0.21 |
| Effect from school type (public=1, private=0)       | -0.07   | 0.07 |         |      |         |      |
| Effect from urban school (urban=1, else=0)          |         |      | 1.06    | 1.63 |         |      |
| Effect from rural school (rural=1, else=0)          |         |      | 1.03    | 1.53 |         |      |
| Effect from race composition (multiple=1, single=0) |         |      |         |      | 0.17    | 0.26 |
| Effect from school type x similarity                | -0.26   | 0.27 |         |      |         |      |
| Effect from urban school x similarity               |         |      | 2.42    | 2.34 |         |      |
| Effect from rural school x similarity               |         |      | 2.34    | 2.09 |         |      |
| Effect from race composition x similarity           |         |      |         |      | 0.35    | 0.63 |

† Two-sided p<0.1; \* Two-sided p<0.05; \*\* Two-sided p<0.01; \*\*\* Two-sided p<0.001
