# Supplementary material for: Alcohol Use among Adolescent Youth: The Role of Friendship Networks and Family Factors in Multiple School Studies
Source: PubMed Central journal article supplement (PMC4355410; doi:10.1371/journal.pone.0119965), 2015-03-10
Supplement: pone.0119965.s007.pdf [file pone.0119965.s007.pdf]

**S3 Table. Distribution of drinking behavior in the twelve small schools.**

|                                                             | In-School Survey             | wave 2 In-Home Survey | In-School Survey             | wave 2 In-Home Survey | In-School Survey             | wave 2 In-Home Survey |
|-------------------------------------------------------------|------------------------------|-----------------------|------------------------------|-----------------------|------------------------------|-----------------------|
|                                                             | school 002 ( <i>n</i> = 78)  |                       | school 003 ( <i>n</i> = 163) |                       | school 007 ( <i>n</i> = 197) |                       |
| Alcohol use (past 12 months, %)                             |                              |                       |                              |                       |                              |                       |
| 0 = never                                                   | 71.79                        | 74.36                 | 41.10                        | 50.92                 | 40.10                        | 49.24                 |
| 1 = 1 or 2 days                                             | 16.67                        | 8.97                  | 23.93                        | 20.86                 | 18.78                        | 13.20                 |
| 2 = once a month or less (3-12 times in the past 12 months) | 2.56                         | 7.69                  | 10.43                        | 7.36                  | 11.17                        | 13.20                 |
| 3 = 2 or 3 days a month                                     | 1.28                         | 3.85                  | 8.59                         | 6.75                  | 8.12                         | 11.68                 |
| 4 = more than 1 or 2 days a week                            | 7.69                         | 5.13                  | 15.95                        | 14.11                 | 21.83                        | 12.69                 |
|                                                             | school 008 ( <i>n</i> = 149) |                       | school 028 ( <i>n</i> = 168) |                       | school 081 ( <i>n</i> = 122) |                       |
| Alcohol use (past 12 months, %)                             |                              |                       |                              |                       |                              |                       |
| 0 = never                                                   | 38.26                        | 48.99                 | 51.19                        | 67.86                 | 73.77                        | 73.77                 |
| 1 = 1 or 2 days                                             | 24.83                        | 17.45                 | 25.60                        | 11.31                 | 12.30                        | 9.02                  |
| 2 = once a month or less (3-12 times in the past 12 months) | 8.72                         | 13.42                 | 9.52                         | 10.12                 | 4.10                         | 4.10                  |
| 3 = 2 or 3 days a month                                     | 8.05                         | 8.05                  | 6.55                         | 5.36                  | 2.46                         | 4.92                  |
| 4 = more than 1 or 2 days a week                            | 20.13                        | 12.08                 | 7.14                         | 5.36                  | 7.38                         | 8.20                  |
|                                                             | school 088 ( <i>n</i> = 104) |                       | school 106 ( <i>n</i> = 102) |                       | school 115 ( <i>n</i> = 30)  |                       |
| Alcohol use (past 12 months, %)                             |                              |                       |                              |                       |                              |                       |
| 0 = never                                                   | 44.23                        | 56.73                 | 61.76                        | 70.59                 | 50.00                        | 53.33                 |
| 1 = 1 or 2 days                                             | 25.96                        | 11.54                 | 24.51                        | 11.76                 | 30.00                        | 13.33                 |
| 2 = once a month or less (3-12 times in the past 12 months) | 8.65                         | 14.42                 | 5.88                         | 12.75                 | 6.67                         | 16.67                 |
| 3 = 2 or 3 days a month                                     | 8.65                         | 4.81                  | 4.90                         | 1.96                  | 13.33                        | 6.67                  |
| 4 = more than 1 or 2 days a week                            | 12.50                        | 12.50                 | 2.94                         | 2.94                  | 50.00                        | 10.00                 |
|                                                             | school 126 ( <i>n</i> = 62)  |                       | school 194 ( <i>n</i> = 46)  |                       | school 369 ( <i>n</i> = 63)  |                       |
| Alcohol use (past 12 months, %)                             |                              |                       |                              |                       |                              |                       |
| 0 = never                                                   | 66.13                        | 69.35                 | 52.17                        | 71.74                 | 69.84                        | 73.02                 |
| 1 = 1 or 2 days                                             | 20.97                        | 14.52                 | 26.09                        | 10.87                 | 22.22                        | 9.52                  |

|                                                             |      |      |       |      |      |      |
|-------------------------------------------------------------|------|------|-------|------|------|------|
| 2 = once a month or less (3-12 times in the past 12 months) | 4.84 | 8.06 | 13.04 | 6.52 | 1.59 | 4.76 |
| 3 = 2 or 3 days a month                                     | 3.23 | 1.61 | 2.17  | 4.35 | 1.59 | 6.35 |
| 4 = more than 1 or 2 days a week                            | 4.84 | 6.45 | 6.52  | 6.52 | 4.76 | 6.35 |
